# Supplementary material for: Hindered rotor tunneling splittings: an application of the two-dimensional non-separable method to benzyl alcohol and two of its fluorine derivatives
Source: Royal Society of Chemistry journal article supplement (doi:10.1039/c5cp05307b), 2016-01-01
Supplement: c5cp05307b1.pdf [file c5cp05307b1.pdf]

**Supplementary Material for Hindered rotor tunneling splittings: an application of the two-dimensional non-separable method to benzyl alcohol and two of its fluorine derivatives**

Tiago Vinicius Alves,<sup>1</sup> Luis Simón-Carballido,<sup>2</sup> Fernando Rei Ornellas,<sup>1</sup> and Antonio Fernández-Ramos<sup>2, a)</sup>

<sup>1)</sup>*Departamento de Química Fundamental, Instituto de Química, Universidade de São Paulo, Av. Prof. Lineu Prestes 748, São Paulo, SP, 05508-000, Brazil*

<sup>2)</sup>*Department of Physical Chemistry and Center for Research in Biological Chemistry and Molecular Materials (CIQUS), University of Santiago de Compostela, 15782 Santiago de Compostela, Spain*

(Dated: 4 February 2016)

---

<sup>a)</sup>Electronic mail: [qf.ramos@usc.es](mailto:qf.ramos@usc.es)

Tables S.1 to S.6: Equilibrium geometries of the conformers of 3FBA.

Tables S.7 to S.9: Equilibrium geometries of the conformers of 4FBA.

Tables S.10 to S.12: Equilibrium geometries of the conformers of BA.

Tables S.13 to S.18: Parameters used to fit by Fourier series the  $d_{\tau\zeta}$  elements of kinetic energy.

Table S.19: One-dimensional terms of potential of Eq. 5.

Table S.20: Coupling parameters of potential of Eq. 5.

Table S.21: One-dimensional terms of LRP 1D-potential.

Table S.22: Splittings of 3FBA, 4FBA and BA.

Table S.23 to S.25: Energy levels of the 1D-potentials.

5)

TABLE S.1. Cartesian coordinates (in Å) of structure **3FBA-M1**

| DF-LMP2-F12/cc-pVQZ energy (a.u.): -445.431996965447 |               |               |               |
|------------------------------------------------------|---------------|---------------|---------------|
| Cartesian coordinates                                |               |               |               |
| Atomic Symbol                                        | X             | Y             | Z             |
| C                                                    | -0.3448315604 | 0.1853267189  | -0.8633761800 |
| C                                                    | 0.7452393685  | 0.1883652653  | 0.0084459571  |
| C                                                    | 0.5181835601  | 0.0226819469  | 1.3620731335  |
| C                                                    | -0.7514834137 | -0.1468269210 | 1.8903866384  |
| C                                                    | -1.8322084930 | -0.1487116143 | 1.0155488766  |
| C                                                    | -1.6305924524 | 0.0162262608  | -0.3521504665 |
| H                                                    | 1.7526027277  | 0.3175086306  | -0.3609936083 |
| F                                                    | 1.5715457114  | 0.0259366042  | 2.2015742064  |
| H                                                    | -0.8769078000 | -0.2724771734 | 2.9555629947  |
| H                                                    | -2.8323653637 | -0.2792526495 | 1.4039394123  |
| H                                                    | -2.4769698601 | 0.0135723706  | -1.0263296878 |
| C                                                    | -0.1170888366 | 0.3645198528  | -2.3420982516 |
| O                                                    | 0.9809513335  | -0.3917648045 | -2.8329049163 |
| H                                                    | -1.0365723868 | 0.1254049550  | -2.8810353715 |
| H                                                    | 0.1337088956  | 1.4008995687  | -2.5613160826 |
| H                                                    | 0.8118604619  | -1.3146123398 | -2.6248518719 |

TABLE S.2. Cartesian coordinates (in Å) of structure **3FBA-M1\***

---

DF-LMP2-F12/cc-pVQZ energy (a.u.): -445.431996965447

---

Cartesian coordinates

---

| Atomic Symbol | X            | Y            | Z            |
|---------------|--------------|--------------|--------------|
| C             | -0.400806806 | -0.920046591 | -1.607258773 |
| C             | 0.188431340  | -2.108541359 | -2.041558548 |
| C             | -0.082765083 | -3.277895249 | -1.355719052 |
| C             | -0.918372162 | -3.318391231 | -0.251172301 |
| C             | -1.501543959 | -2.130404303 | 0.175335697  |
| C             | -1.244705743 | -0.939104309 | -0.497935036 |
| H             | 0.846599400  | -2.122307578 | -2.898629044 |
| F             | 0.486916553  | -4.423633080 | -1.776542203 |
| H             | -1.098877133 | -4.257312478 | 0.250788632  |
| H             | -2.157091809 | -2.136666303 | 1.034649225  |
| H             | -1.702480309 | -0.018835795 | -0.159663414 |
| C             | -0.117088837 | 0.364519853  | -2.342098252 |
| O             | 1.253801648  | 0.522553351  | -2.680084306 |
| H             | -0.753742134 | 0.422515342  | -3.227755214 |
| H             | -0.352234823 | 1.219261773  | -1.710305967 |
| H             | 1.759178415  | 0.479658666  | -1.863824706 |

---

TABLE S.3. Cartesian coordinates (in Å) of structure **3FBA-M2**

| DF-LMP2-F12/cc-pVQZ energy (a.u.): -445.431784564556 |               |               |               |
|------------------------------------------------------|---------------|---------------|---------------|
| Cartesian coordinates                                |               |               |               |
| Atomic Symbol                                        | X             | Y             | Z             |
| C                                                    | 0.2177342686  | -0.1530369772 | -0.8152996199 |
| C                                                    | 0.1138558561  | -0.9410395974 | 0.3295811229  |
| C                                                    | -0.0346527338 | -0.3249488267 | 1.5610059751  |
| C                                                    | -0.0842028156 | 1.0503642456  | 1.6997874119  |
| C                                                    | 0.0202703613  | 1.8310050205  | 0.5511133682  |
| C                                                    | 0.1700134494  | 1.2373649318  | -0.6969611343 |
| H                                                    | 0.1468719786  | -2.0208267819 | 0.2751133248  |
| F                                                    | -0.1341781012 | -1.0955666706 | 2.6615473521  |
| H                                                    | -0.2011138731 | 1.4872025329  | 2.6804115500  |
| H                                                    | -0.0159887461 | 2.9079642049  | 0.6362589165  |
| H                                                    | 0.2508285681  | 1.8459375073  | -1.5866120081 |
| C                                                    | 0.3800858630  | -0.7957783965 | -2.1686686996 |
| O                                                    | -0.4552102548 | -0.2175411316 | -3.1620494457 |
| H                                                    | 1.3952168501  | -0.6510813354 | -2.5339261765 |
| H                                                    | 0.2089205810  | -1.8713967447 | -2.0841427634 |
| H                                                    | -1.3616988128 | -0.2825994023 | -2.8497519404 |

TABLE S.4. Cartesian coordinates (in Å) of structure **3FBA-M2\***

---

DF-LMP2-F12/cc-pVQZ energy (a.u.): -445.431784564556

---

Cartesian coordinates

---

| Atomic Symbol | X            | Y            | Z            |
|---------------|--------------|--------------|--------------|
| C             | 1.438071676  | -0.148534599 | -1.312617343 |
| C             | 1.118639732  | 0.939747098  | -0.502619226 |
| C             | 2.109806067  | 1.515977198  | 0.274283583  |
| C             | 3.412371594  | 1.050667590  | 0.277683643  |
| C             | 3.723767561  | -0.037170474 | -0.534355531 |
| C             | 2.747269569  | -0.633690003 | -1.323746204 |
| H             | 0.114967088  | 1.341640590  | -0.469152605 |
| F             | 1.790768666  | 2.567444269  | 1.053758161  |
| H             | 4.152631267  | 1.531373877  | 0.899822428  |
| H             | 4.735557159  | -0.417328229 | -0.547296274 |
| H             | 2.992061715  | -1.477832989 | -1.952928026 |
| C             | 0.380085863  | -0.795778397 | -2.168668700 |
| O             | 0.409377478  | -2.215123685 | -2.109641596 |
| H             | -0.611163271 | -0.518678703 | -1.814434173 |
| H             | 0.475480526  | -0.439949577 | -3.197105731 |
| H             | 0.316041669  | -2.467077355 | -1.186986953 |

---

TABLE S.5. Cartesian coordinates (in Å) of structure **3FBA-M3**

---

| DF-LMP2-F12/cc-pVQZ energy (a.u.): -445.430724510637 |               |               |               |
|------------------------------------------------------|---------------|---------------|---------------|
| Cartesian coordinates                                |               |               |               |
| Atomic Symbol                                        | X             | Y             | Z             |
| C                                                    | -0.4118645738 | -0.0000001723 | -0.8616326861 |
| C                                                    | 0.7183138758  | -0.0000001677 | -0.0502803090 |
| C                                                    | 0.5486129693  | 0.0000000085  | 1.3244427489  |
| C                                                    | -0.6966751858 | 0.0000001801  | 1.9256874904  |
| C                                                    | -1.8204429351 | 0.0000001737  | 1.1033210317  |
| C                                                    | -1.6800346847 | -0.0000000010 | -0.2789574387 |
| H                                                    | 1.7087825274  | -0.0000002982 | -0.4779232097 |
| F                                                    | 1.6457333065  | 0.0000000124  | 2.1077499007  |
| H                                                    | -0.7748274394 | 0.0000003136  | 3.0026088299  |
| H                                                    | -2.8061342946 | 0.0000003057  | 1.5467601922  |
| H                                                    | -2.5606372689 | -0.0000000043 | -0.9087316018 |
| C                                                    | -0.2899245104 | -0.0000003593 | -2.3612900252 |
| O                                                    | 1.0808072868  | -0.0000005168 | -2.7241160595 |
| H                                                    | -0.7973066786 | -0.8832496826 | -2.7583503721 |
| H                                                    | -0.7973058886 | 0.8832493218  | -2.7583499032 |
| H                                                    | 1.1318598710  | 0.0000120431  | -3.6820512945 |

---

TABLE S.6. Cartesian coordinates (in Å) of structure **3FBA-M4**

---

|                                                      |               |               |               |
|------------------------------------------------------|---------------|---------------|---------------|
| DF-LMP2-F12/cc-pVQZ energy (a.u.): -445.430436355265 |               |               |               |
| Cartesian coordinates                                |               |               |               |
| Atomic Symbol                                        | X             | Y             | Z             |
| C                                                    | -0.0000001298 | -0.2274660686 | -0.8029981832 |
| C                                                    | -0.0000000778 | -0.9621511722 | 0.3833801042  |
| C                                                    | -0.0000000189 | -0.2893123118 | 1.5903481231  |
| C                                                    | -0.0000000095 | 1.0932219959  | 1.6695163790  |
| C                                                    | -0.0000000616 | 1.8148916895  | 0.4813095802  |
| C                                                    | -0.0000001215 | 1.1634226429  | -0.7500931722 |
| H                                                    | -0.0000000825 | -2.0442654792 | 0.3797743173  |
| F                                                    | 0.0000000311  | -1.0074042373 | 2.7316880978  |
| H                                                    | 0.0000000374  | 1.5765054282  | 2.6351264317  |
| H                                                    | -0.0000000555 | 2.8952765813  | 0.5166544658  |
| H                                                    | -0.0000001619 | 1.7264759726  | -1.6702122744 |
| C                                                    | -0.0000001936 | -0.9718794463 | -2.1108112253 |
| O                                                    | -0.0000002395 | -0.0444174781 | -3.1833363813 |
| H                                                    | 0.8831800111  | -1.6150308390 | -2.1534085264 |
| H                                                    | -0.8831689502 | -1.6150511459 | -2.1534116340 |
| H                                                    | -0.0000002797 | -0.5437601811 | -4.0024519150 |

---



TABLE S.7. Cartesian coordinates (in Å) of structure **4FBA-M1**

---

DF-LMP2-F12/cc-pVQZ energy (a.u.): -445.431876253378

---

Cartesian coordinates

---

| Atomic Symbol | X             | Y             | Z             |
|---------------|---------------|---------------|---------------|
| C             | -0.2188955006 | 0.2298701967  | -0.9817902880 |
| C             | 1.0472035951  | 0.2737976087  | -0.3928611871 |
| C             | 1.1989363825  | 0.1382155531  | 0.9813723984  |
| C             | 0.0656553721  | -0.0420434243 | 1.7587418878  |
| C             | -1.2037320381 | -0.0907897515 | 1.2118304310  |
| C             | -1.3352622759 | 0.0470766248  | -0.1676615375 |
| H             | 1.9179590497  | 0.4153872261  | -1.0187325145 |
| H             | 2.1703679801  | 0.1698253867  | 1.4526185633  |
| F             | 0.2067097645  | -0.1740116802 | 3.0911303897  |
| H             | -2.0597563020 | -0.2329789928 | 1.8548347103  |
| H             | -2.3213259088 | 0.0114059839  | -0.6128263971 |
| C             | -0.3617397451 | 0.3786862188  | -2.4715266661 |
| O             | 0.4551772822  | -0.5321158406 | -3.1987284187 |
| H             | -1.4131818512 | 0.2740235295  | -2.7493697827 |
| H             | -0.0321999148 | 1.3659925162  | -2.7891517144 |
| H             | 0.2431847450  | -1.4168757334 | -2.8891487876 |

---

TABLE S.8. Cartesian coordinates (in Å) of structure **4FBA-M1\***

---

DF-LMP2-F12/cc-pVQZ energy (a.u.): -445.431876253378

---

Cartesian coordinates

---

| Atomic Symbol | X            | Y            | Z            |
|---------------|--------------|--------------|--------------|
| C             | -0.402464336 | -0.862094524 | -1.622603927 |
| C             | -0.066097801 | -2.099734583 | -2.176570228 |
| C             | -0.097847856 | -3.256645196 | -1.408147788 |
| C             | -0.471037261 | -3.158094053 | -0.076930371 |
| C             | -0.810684534 | -1.950930428 | 0.506360684  |
| C             | -0.772757126 | -0.802429735 | -0.280286061 |
| H             | 0.222221750  | -2.153344865 | -3.217711609 |
| H             | 0.159162517  | -4.221236625 | -1.820774159 |
| F             | -0.503585784 | -4.276035180 | 0.672548990  |
| H             | -1.095658705 | -1.919674004 | 1.547639984  |
| H             | -1.035472709 | 0.151021069  | 0.159802250  |
| C             | -0.361739745 | 0.378686219  | -2.471526666 |
| O             | 0.886791172  | 0.556047832  | -3.131412731 |
| H             | -1.186913769 | 0.358126220  | -3.187310639 |
| H             | -0.481224265 | 1.266841761  | -1.854145844 |
| H             | 1.571575545  | 0.541394607  | -2.457293975 |

---

TABLE S.9. Cartesian coordinates (in Å) of structure **4FBA-M2**

---

|                                                      |               |               |               |
|------------------------------------------------------|---------------|---------------|---------------|
| DF-LMP2-F12/cc-pVQZ energy (a.u.): -445.430278644345 |               |               |               |
| Cartesian coordinates                                |               |               |               |
| Atomic Symbol                                        | X             | Y             | Z             |
| C                                                    | 0.3085889755  | -0.0000001937 | -0.9759937757 |
| C                                                    | 1.3915881930  | -0.0000002566 | -0.0961094659 |
| C                                                    | 1.1962258597  | -0.0000001748 | 1.2797501587  |
| C                                                    | -0.1027889707 | -0.0000000290 | 1.7603998080  |
| C                                                    | -1.1976817266 | 0.0000000367  | 0.9163099613  |
| C                                                    | -0.9843904112 | -0.0000000469 | -0.4603976310 |
| H                                                    | 2.4021836486  | -0.0000003708 | -0.4857725754 |
| H                                                    | 2.0251970744  | -0.0000002221 | 1.9720208316  |
| F                                                    | -0.3027154941 | 0.0000000512  | 3.0933453745  |
| H                                                    | -2.1940894171 | 0.0000001508  | 1.3333560873  |
| H                                                    | -1.8241771231 | 0.0000000021  | -1.1381673239 |
| C                                                    | 0.5682418811  | -0.0000002865 | -2.4577279663 |
| O                                                    | -0.6679710705 | -0.0000002006 | -3.1534900464 |
| H                                                    | 1.1582679371  | 0.8831356089  | -2.7174253683 |
| H                                                    | 1.1582763758  | -0.8831213582 | -2.7174438961 |
| H                                                    | -0.4756594229 | -0.0000002620 | -4.0933393946 |

---

TABLE S.10. Cartesian coordinates (in Å) of structure **BA-M1**

| DF-LMP2-F12/cc-pVQZ energy (a.u.): -346.251756752780 |               |               |               |
|------------------------------------------------------|---------------|---------------|---------------|
| Cartesian coordinates                                |               |               |               |
| Atomic Symbol                                        | X             | Y             | Z             |
| C                                                    | -0.2109793671 | 0.2167041383  | -0.4484175670 |
| C                                                    | 1.0886553962  | 0.2235577749  | 0.0633279992  |
| C                                                    | 1.3110355121  | 0.0384462319  | 1.4228148072  |
| C                                                    | 0.2360088107  | -0.1558745504 | 2.2875972647  |
| C                                                    | -1.0612752791 | -0.1641170344 | 1.7863447924  |
| C                                                    | -1.2808699833 | 0.0216239294  | 0.4237574699  |
| H                                                    | 1.9208736742  | 0.3747618295  | -0.6114108933 |
| H                                                    | 2.3209113537  | 0.0454039139  | 1.8093209038  |
| H                                                    | 0.4097040958  | -0.2997924701 | 3.3448967647  |
| H                                                    | -1.8993393166 | -0.3144725245 | 2.4527774895  |
| H                                                    | -2.2911191590 | 0.0151693665  | 0.0336557020  |
| C                                                    | -0.4415761188 | 0.4178953801  | -1.9212254915 |
| O                                                    | 0.3340552494  | -0.4616952970 | -2.7284111875 |
| H                                                    | -1.5071248168 | 0.3170360211  | -2.1410376123 |
| H                                                    | -0.1347510623 | 1.4182992841  | -2.2207993791 |
| H                                                    | 0.1562582576  | -1.3565555259 | -2.4265211152 |

TABLE S.11. Cartesian coordinates (in Å) of structure **BA-M1\***

---

| DF-LMP2-F12/cc-pVQZ energy (a.u.): -346.251756752780 |               |               |               |
|------------------------------------------------------|---------------|---------------|---------------|
| Cartesian coordinates                                |               |               |               |
| Atomic Symbol                                        | X             | Y             | Z             |
| C                                                    | 0.2109793671  | -0.2167041383 | 0.4484175670  |
| C                                                    | -1.0886553962 | -0.2235577749 | -0.0633279992 |
| C                                                    | -1.3110355121 | -0.0384462319 | -1.4228148072 |
| C                                                    | -0.2360088107 | 0.1558745504  | -2.2875972647 |
| C                                                    | 1.0612752791  | 0.1641170344  | -1.7863447924 |
| C                                                    | 1.2808699833  | -0.0216239294 | -0.4237574699 |
| H                                                    | -1.9208736742 | -0.3747618295 | 0.6114108933  |
| H                                                    | -2.3209113537 | -0.0454039139 | -1.8093209038 |
| H                                                    | -0.4097040958 | 0.2997924701  | -3.3448967647 |
| H                                                    | 1.8993393166  | 0.3144725245  | -2.4527774895 |
| H                                                    | 2.2911191590  | -0.0151693665 | -0.0336557020 |
| C                                                    | 0.4415761188  | -0.4178953801 | 1.9212254915  |
| O                                                    | -0.3340552494 | 0.4616952970  | 2.7284111875  |
| H                                                    | 1.5071248168  | -0.3170360211 | 2.1410376123  |
| H                                                    | 0.1347510623  | -1.4182992841 | 2.2207993791  |
| H                                                    | -0.1562582576 | 1.3565555259  | 2.4265211152  |

---

TABLE S.12. Cartesian coordinates (in Å) of structure **BA-M2**

---

| DF-LMP2-F12/cc-pVQZ energy (a.u.): -346.249920738367 |               |               |               |
|------------------------------------------------------|---------------|---------------|---------------|
| Cartesian coordinates                                |               |               |               |
| Atomic Symbol                                        | X             | Y             | Z             |
| C                                                    | -0.2939057238 | 0.0000939468  | -0.4377422521 |
| C                                                    | 1.0378868083  | 0.0001255282  | -0.0321388682 |
| C                                                    | 1.3557174619  | 0.0000482955  | 1.3242479129  |
| C                                                    | 0.3490685400  | -0.0000607694 | 2.2835608093  |
| C                                                    | -0.9842165567 | -0.0000926588 | 1.8815542007  |
| C                                                    | -1.3008851471 | -0.0000155829 | 0.5282612175  |
| H                                                    | 1.8168178821  | 0.0002102634  | -0.7795279544 |
| H                                                    | 2.3930097181  | 0.0000735728  | 1.6300635665  |
| H                                                    | 0.5992795206  | -0.0001204868 | 3.3352678440  |
| H                                                    | -1.7744293485 | -0.0001772661 | 2.6196327215  |
| H                                                    | -2.3397142969 | -0.0000407485 | 0.2197760517  |
| C                                                    | -0.6782745727 | 0.0001748487  | -1.8923586796 |
| O                                                    | 0.4914146895  | -0.0002901039 | -2.6946756303 |
| H                                                    | -1.2898467848 | -0.8826178735 | -2.0986267622 |
| H                                                    | -1.2891957081 | 0.8833989467  | -2.0987048115 |
| H                                                    | 0.2159547261  | 0.0006180967  | -3.6132726783 |

---

TABLE S.13. Parameters (in  $100/\text{amu}\cdot\text{\AA}^2$ ) used to fit by Fourier series the one-dimensional parameters of  $d_{\tau\zeta}$  elements of the inverse of  $\mathbf{D}$  matrix for system **3FBA**

| Parameter         | $\tau=1,\zeta=1$ | $\tau=1,\zeta=2$ | $\tau=2,\zeta=2$ |
|-------------------|------------------|------------------|------------------|
| $a_0^{\tau\zeta}$ | 5.6091           | -2.5027          | 127.3530         |
| $a_1^{\tau\zeta}$ | 0.3477           | -0.2082          | -0.0659          |
| $a_2^{\tau\zeta}$ | 0.5095           | -0.4828          | 0.8277           |
| $a_3^{\tau\zeta}$ | 0.0280           | -0.0085          | -0.0117          |
| $a_4^{\tau\zeta}$ | 0.0399           | -0.0375          | 0.0153           |
| $a_5^{\tau\zeta}$ | -0.0002          | 0.0011           | -0.0008          |
| $a_6^{\tau\zeta}$ | 0.0004           | 0.0008           | -0.0122          |
| $b_1^{\tau\zeta}$ | 0.2335           | -6.1262          | 4.3689           |
| $b_2^{\tau\zeta}$ | 0.1511           | -0.0761          | 3.8746           |
| $b_3^{\tau\zeta}$ | 0.0005           | -0.1265          | 0.7214           |
| $b_4^{\tau\zeta}$ | 0.0098           | -0.0237          | 0.1290           |
| $b_5^{\tau\zeta}$ | 0.0004           | -0.0055          | 0.0282           |
| $b_6^{\tau\zeta}$ | 0.0001           | -0.0004          | 0.0152           |

TABLE S.14. Parameters (in  $100/\text{amu}\cdot\text{\AA}^2$ ) used to fit by Fourier series the cross-term parameters of  $d_{\tau\zeta}$  elements of the inverse of  $\mathbf{D}$  matrix for system **3FBA**

| Parameter                                | $\tau=1,\zeta=1$ | $\tau=1,\zeta=2$ | $\tau=2,\zeta=2$ |
|------------------------------------------|------------------|------------------|------------------|
| $c_{11}^{\tau\zeta}, d_{11}^{\tau\zeta}$ | 0.0245, -0.0039  | -0.0153, -0.4117 | 0.0584, 0.2311   |
| $c_{12}^{\tau\zeta}, d_{12}^{\tau\zeta}$ | 0.0013, 0.0227   | -0.0015, -0.0048 | 0.1942, -0.0266  |
| $c_{13}^{\tau\zeta}, d_{13}^{\tau\zeta}$ | 0.0013, -0.0004  | -0.0076, -0.0057 | 0.0200, -0.0235  |
| $c_{14}^{\tau\zeta}, d_{14}^{\tau\zeta}$ | 0.0008, 0.0004   | -0.0010, 0.0001  | 0.0088, -0.0009  |
| $c_{15}^{\tau\zeta}, d_{15}^{\tau\zeta}$ | 0.0001, 0.0000   | -0.0002, -0.0002 | 0.0013, -0.0013  |
| $c_{16}^{\tau\zeta}, d_{16}^{\tau\zeta}$ | 0.0002, 0.0000   | 0.0001, 0.0001   | -0.0002, -0.0013 |
| $c_{21}^{\tau\zeta}, d_{21}^{\tau\zeta}$ | 0.0937, -0.0720  | -0.2166, -0.2465 | 1.0097, -0.1383  |
| $c_{22}^{\tau\zeta}, d_{22}^{\tau\zeta}$ | 0.0410, -0.0054  | -0.0786, 0.0534  | 0.7274, -0.6456  |
| $c_{23}^{\tau\zeta}, d_{23}^{\tau\zeta}$ | 0.0130, -0.0152  | -0.0429, 0.0358  | 0.2680, -0.2639  |
| $c_{24}^{\tau\zeta}, d_{24}^{\tau\zeta}$ | 0.0037, -0.0032  | -0.0135, 0.0129  | 0.0986, -0.1211  |
| $c_{25}^{\tau\zeta}, d_{25}^{\tau\zeta}$ | 0.0009, -0.0011  | -0.0039, 0.0045  | 0.0304, -0.0339  |
| $c_{26}^{\tau\zeta}, d_{26}^{\tau\zeta}$ | 0.0000, -0.0002  | -0.0009, 0.0011  | 0.0066, -0.0080  |
| $c_{31}^{\tau\zeta}, d_{31}^{\tau\zeta}$ | 0.0029, -0.0046  | -0.0007, -0.0174 | -0.0043, 0.0269  |
| $c_{32}^{\tau\zeta}, d_{32}^{\tau\zeta}$ | 0.0036, -0.0019  | -0.0003, -0.0001 | 0.0161, -0.0055  |
| $c_{33}^{\tau\zeta}, d_{33}^{\tau\zeta}$ | 0.0008, -0.0015  | -0.0005, -0.0001 | 0.0024, -0.0044  |
| $c_{34}^{\tau\zeta}, d_{34}^{\tau\zeta}$ | 0.0000, -0.0002  | 0.0001, 0.0000   | 0.0021, -0.0003  |
| $c_{35}^{\tau\zeta}, d_{35}^{\tau\zeta}$ | -0.0001, 0.0000  | 0.0000, -0.0001  | -0.0001, 0.0007  |
| $c_{36}^{\tau\zeta}, d_{36}^{\tau\zeta}$ | -0.0003, 0.0000  | 0.0001, -0.0001  | -0.0006, 0.0009  |
| $c_{41}^{\tau\zeta}, d_{41}^{\tau\zeta}$ | 0.0117, -0.0184  | -0.0228, 0.0114  | 0.1012, -0.1265  |
| $c_{42}^{\tau\zeta}, d_{42}^{\tau\zeta}$ | 0.0177, -0.0160  | -0.0273, 0.0295  | 0.2055, -0.2350  |
| $c_{43}^{\tau\zeta}, d_{43}^{\tau\zeta}$ | 0.0090, -0.0099  | -0.0206, 0.0217  | 0.1953, -0.2049  |
| $c_{44}^{\tau\zeta}, d_{44}^{\tau\zeta}$ | 0.0036, -0.0038  | -0.0118, 0.0119  | 0.1130, -0.1133  |
| $c_{45}^{\tau\zeta}, d_{45}^{\tau\zeta}$ | 0.0012, -0.0012  | -0.0052, 0.0050  | 0.0516, -0.0495  |
| $c_{46}^{\tau\zeta}, d_{46}^{\tau\zeta}$ | 0.0001, -0.0003  | -0.0019, 0.0019  | 0.0169, -0.0166  |
| $c_{51}^{\tau\zeta}, d_{51}^{\tau\zeta}$ | -0.0006, 0.0004  | 0.0007, 0.0002   | -0.0002, -0.0008 |
| $c_{52}^{\tau\zeta}, d_{52}^{\tau\zeta}$ | 0.0001, -0.0003  | 0.0001, -0.0001  | -0.0011, 0.0003  |
| $c_{53}^{\tau\zeta}, d_{53}^{\tau\zeta}$ | 0.0003, -0.0003  | 0.0001, 0.0000   | -0.0009, -0.0012 |
| $c_{54}^{\tau\zeta}, d_{54}^{\tau\zeta}$ | 0.0002, -0.0001  | 0.0000, 0.0000   | 0.0010, -0.0002  |
| $c_{55}^{\tau\zeta}, d_{55}^{\tau\zeta}$ | 0.0000, 0.0000   | -0.0001, 0.0000  | 0.0005, -0.0005  |
| $c_{56}^{\tau\zeta}, d_{56}^{\tau\zeta}$ | 0.0001, 0.0000   | -0.0001, 0.0000  | 0.0009, -0.0007  |
| $c_{61}^{\tau\zeta}, d_{61}^{\tau\zeta}$ | -0.0004, -0.0004 | 0.0011, -0.0005  | -0.0216, 0.0116  |
| $c_{62}^{\tau\zeta}, d_{62}^{\tau\zeta}$ | 0.0019, -0.0018  | -0.0017, 0.0019  | 0.0075, -0.0027  |
| $c_{63}^{\tau\zeta}, d_{63}^{\tau\zeta}$ | 0.0023, -0.0021  | -0.0032, 0.0026  | 0.0240, -0.0209  |
| $c_{64}^{\tau\zeta}, d_{64}^{\tau\zeta}$ | 0.0011, -0.0010  | -0.0023, 0.0019  | 0.0218, -0.0201  |
| $c_{65}^{\tau\zeta}, d_{65}^{\tau\zeta}$ | 0.0003, -0.0003  | -0.0012, 0.0009  | 0.0132, -0.0113  |
| $c_{66}^{\tau\zeta}, d_{66}^{\tau\zeta}$ | 0.0001, 0.0000   | -0.0006, 0.0003  | 0.0058, -0.0042  |



TABLE S.15. Parameters (in  $100/\text{amu}\cdot\text{\AA}^2$ ) used to fit by Fourier series the one-dimensional parameters of  $d_{\tau\zeta}$  elements of the inverse of  $\mathbf{D}$  matrix for system **4FBA**

| Parameter         | $\tau=1,\zeta=1$ | $\tau=1,\zeta=2$ | $\tau=2,\zeta=2$ |
|-------------------|------------------|------------------|------------------|
| $a_0^{\tau\zeta}$ | 5.9708           | -2.3557          | 127.0170         |
| $a_2^{\tau\zeta}$ | 0.2385           | -0.2530          | 0.7348           |
| $a_4^{\tau\zeta}$ | 0.0127           | -0.0142          | 0.0094           |
| $a_6^{\tau\zeta}$ | -0.0011          | 0.0022           | -0.0135          |
| $b_1^{\tau\zeta}$ | 0.2146           | -6.0986          | 4.2882           |
| $b_2^{\tau\zeta}$ | 0.1474           | -0.0672          | 3.9607           |
| $b_3^{\tau\zeta}$ | -0.0013          | -0.1269          | 0.7125           |
| $b_4^{\tau\zeta}$ | 0.0092           | -0.0225          | 0.1307           |
| $b_5^{\tau\zeta}$ | 0.0002           | -0.0053          | 0.0288           |
| $b_6^{\tau\zeta}$ | -0.0002          | -0.0001          | 0.0154           |

TABLE S.16. Parameters (in  $100/\text{amu}\cdot\text{\AA}^2$ ) used to fit by Fourier series the cross-term parameters of  $d_{\tau\zeta}$  elements of the inverse of  $\mathbf{D}$  matrix for system **4FBA**

| Parameter                                | $\tau=1,\zeta=1$ | $\tau=1,\zeta=2$ | $\tau=2,\zeta=2$ |
|------------------------------------------|------------------|------------------|------------------|
| $c_{21}^{\tau\zeta}, d_{21}^{\tau\zeta}$ | 0.0645, -0.0520  | -0.1827, -0.0393 | 0.9801, -0.4901  |
| $c_{22}^{\tau\zeta}, d_{22}^{\tau\zeta}$ | 0.0322, -0.0164  | -0.0787, 0.0644  | 0.6530, -0.7048  |
| $c_{23}^{\tau\zeta}, d_{23}^{\tau\zeta}$ | 0.0105, -0.0140  | -0.0353, 0.0398  | 0.2770, -0.2886  |
| $c_{24}^{\tau\zeta}, d_{24}^{\tau\zeta}$ | 0.0026, -0.0029  | -0.0120, 0.0137  | 0.1014, -0.1288  |
| $c_{25}^{\tau\zeta}, d_{25}^{\tau\zeta}$ | 0.0007, -0.0009  | -0.0036, 0.0046  | 0.0312, -0.0369  |
| $c_{26}^{\tau\zeta}, d_{26}^{\tau\zeta}$ | -0.0001, -0.0002 | -0.0007, 0.0012  | 0.0065, -0.0091  |
| $c_{41}^{\tau\zeta}, d_{41}^{\tau\zeta}$ | 0.0054, -0.0103  | -0.0170, 0.0281  | 0.1018, -0.1541  |
| $c_{42}^{\tau\zeta}, d_{42}^{\tau\zeta}$ | 0.0119, -0.0123  | -0.0250, 0.0276  | 0.1918, -0.2291  |
| $c_{43}^{\tau\zeta}, d_{43}^{\tau\zeta}$ | 0.0068, -0.0072  | -0.0192, 0.0211  | 0.1907, -0.2024  |
| $c_{44}^{\tau\zeta}, d_{44}^{\tau\zeta}$ | 0.0031, -0.0031  | -0.0116, 0.0115  | 0.1092, -0.1095  |
| $c_{45}^{\tau\zeta}, d_{45}^{\tau\zeta}$ | 0.0012, -0.0009  | -0.0051, 0.0047  | 0.0497, -0.0465  |
| $c_{46}^{\tau\zeta}, d_{46}^{\tau\zeta}$ | 0.0003, -0.0003  | -0.0021, 0.0017  | 0.0162, -0.0148  |
| $c_{61}^{\tau\zeta}, d_{61}^{\tau\zeta}$ | -0.0007, 0.0007  | 0.0017, -0.0006  | -0.0236, 0.0127  |
| $c_{62}^{\tau\zeta}, d_{62}^{\tau\zeta}$ | 0.0007, -0.0007  | -0.0008, 0.0009  | 0.0063, -0.0012  |
| $c_{63}^{\tau\zeta}, d_{63}^{\tau\zeta}$ | 0.0014, -0.0012  | -0.0029, 0.0022  | 0.0253, -0.0244  |
| $c_{64}^{\tau\zeta}, d_{64}^{\tau\zeta}$ | 0.0009, -0.0006  | -0.0025, 0.0022  | 0.0234, -0.0207  |
| $c_{65}^{\tau\zeta}, d_{65}^{\tau\zeta}$ | 0.0003, -0.0002  | -0.0014, 0.0011  | 0.0133, -0.0124  |
| $c_{66}^{\tau\zeta}, d_{66}^{\tau\zeta}$ | 0.0003, -0.0001  | -0.0008, 0.0005  | 0.0067, -0.0053  |

TABLE S.17. Parameters (in  $100/\text{amu}\cdot\text{\AA}^2$ ) used to fit by Fourier series the one-dimensional parameters of  $d_{\tau\zeta}$  elements of the inverse of  $\mathbf{D}$  matrix for system **BA**

| Parameter         | $\tau=1,\zeta=1$ | $\tau=1,\zeta=2$ | $\tau=2,\zeta=2$ |
|-------------------|------------------|------------------|------------------|
| $a_0^{\tau\zeta}$ | 6.2942           | -2.6735          | 127.4790         |
| $a_2^{\tau\zeta}$ | 0.3952           | -0.3970          | 0.8124           |
| $a_4^{\tau\zeta}$ | 0.0278           | -0.0261          | 0.0140           |
| $a_6^{\tau\zeta}$ | -0.0007          | 0.0019           | -0.0135          |
| $b_1^{\tau\zeta}$ | 0.2382           | -6.1209          | 4.2365           |
| $b_2^{\tau\zeta}$ | 0.1486           | -0.0648          | 3.6205           |
| $b_3^{\tau\zeta}$ | -0.0001          | -0.1200          | 0.7007           |
| $b_4^{\tau\zeta}$ | 0.0099           | -0.0235          | 0.1196           |
| $b_5^{\tau\zeta}$ | 0.0003           | -0.0051          | 0.0271           |
| $b_6^{\tau\zeta}$ | 0.0000           | -0.0002          | 0.0147           |

TABLE S.18. Parameters (in  $100/\text{amu}\cdot\text{\AA}^2$ ) used to fit by Fourier series the cross-term parameters of  $d_{\tau\zeta}$  elements of the inverse of  $\mathbf{D}$  matrix for system **BA**

| Parameter                                | $\tau=1,\zeta=1$ | $\tau=1,\zeta=2$ | $\tau=2,\zeta=2$ |
|------------------------------------------|------------------|------------------|------------------|
| $c_{21}^{\tau\zeta}, d_{21}^{\tau\zeta}$ | 0.0853, 232.4840 | -0.2020, -0.1402 | 0.9854, -0.2897  |
| $c_{22}^{\tau\zeta}, d_{22}^{\tau\zeta}$ | 0.0388, 132.4760 | -0.0786, 0.0579  | 0.6369, -0.6237  |
| $c_{23}^{\tau\zeta}, d_{23}^{\tau\zeta}$ | 0.0126, 25.1012  | -0.0375, 0.0368  | 0.2517, -0.2607  |
| $c_{24}^{\tau\zeta}, d_{24}^{\tau\zeta}$ | 0.0033, 6.4150   | -0.0123, 0.0131  | 0.0902, -0.1150  |
| $c_{25}^{\tau\zeta}, d_{25}^{\tau\zeta}$ | 0.0009, 0.7867   | -0.0035, 0.0044  | 0.0276, -0.0332  |
| $c_{26}^{\tau\zeta}, d_{26}^{\tau\zeta}$ | 0.0000, -0.2078  | -0.0007, 0.0012  | 0.0059, -0.0090  |
| $c_{41}^{\tau\zeta}, d_{41}^{\tau\zeta}$ | 0.0090, 20.5502  | -0.0195, 0.0216  | 0.0995, -0.1433  |
| $c_{42}^{\tau\zeta}, d_{42}^{\tau\zeta}$ | 0.0158, 36.5011  | -0.0264, 0.0291  | 0.1908, -0.2234  |
| $c_{43}^{\tau\zeta}, d_{43}^{\tau\zeta}$ | 0.0086, 21.9533  | -0.0198, 0.0215  | 0.1856, -0.1953  |
| $c_{44}^{\tau\zeta}, d_{44}^{\tau\zeta}$ | 0.0035, 10.0673  | -0.0116, 0.0115  | 0.1052, -0.1056  |
| $c_{45}^{\tau\zeta}, d_{45}^{\tau\zeta}$ | 0.0012, 2.7850   | -0.0049, 0.0047  | 0.0479, -0.0436  |
| $c_{46}^{\tau\zeta}, d_{46}^{\tau\zeta}$ | 0.0001, 0.3223   | -0.0019, 0.0016  | 0.0147, -0.0136  |
| $c_{61}^{\tau\zeta}, d_{61}^{\tau\zeta}$ | -0.0007, -0.4765 | 0.0016, -0.0006  | -0.0258, 0.0127  |
| $c_{62}^{\tau\zeta}, d_{62}^{\tau\zeta}$ | 0.0014, 3.5145   | -0.0011, 0.0015  | 0.0052, -0.0018  |
| $c_{63}^{\tau\zeta}, d_{63}^{\tau\zeta}$ | 0.0020, 4.3241   | -0.0031, 0.0025  | 0.0236, -0.0245  |
| $c_{64}^{\tau\zeta}, d_{64}^{\tau\zeta}$ | 0.0011, 1.5230   | -0.0024, 0.0022  | 0.0228, -0.0197  |
| $c_{65}^{\tau\zeta}, d_{65}^{\tau\zeta}$ | 0.0004, 0.3095   | -0.0015, 0.0011  | 0.0134, -0.0124  |
| $c_{66}^{\tau\zeta}, d_{66}^{\tau\zeta}$ | 0.0003, -0.2564  | -0.0008, 0.0005  | 0.0072, -0.0046  |

TABLE S.19. Parameters (in  $\text{cm}^{-1}$ ) for the one-dimensional potentials of the three systems.

| Parameter | 3FBA   | 4FBA   | BA     |
|-----------|--------|--------|--------|
| $a_0$     | 557.84 | 548.16 | 521.13 |
| $a_1$     | -22.67 | -      | -      |
| $a_2$     | 19.79  | 77.53  | 79.50  |
| $a_3$     | 4.18   | -      | -      |
| $a_4$     | -6.96  | -5.53  | -10.04 |
| $a_5$     | 0.30   | -      | -      |
| $a_6$     | -2.65  | -2.59  | -7.64  |
| $b_1$     | 3.16   | 11.35  | -39.49 |
| $b_2$     | 56.83  | 46.97  | 22.30  |
| $b_3$     | 193.75 | 194.43 | 187.20 |
| $b_4$     | -2.45  | -2.12  | -2.43  |
| $b_5$     | 0.02   | 0.06   | 0.12   |
| $b_6$     | 1.50   | 1.52   | 1.32   |

TABLE S.20. Coupling parameters (in  $\text{cm}^{-1}$ ) for the three systems.

| Parameter        | 3FBA            | 4FBA            | BA              |
|------------------|-----------------|-----------------|-----------------|
| $a_0$            | 557.84          | 548.16          | 521.13          |
| $a_1$            | -22.67          | -               | -               |
| $c_{11}, d_{11}$ | 19.80, -0.46    | -, -            | -, -            |
| $c_{12}, d_{12}$ | 7.63, -7.44     | -, -            | -, -            |
| $c_{11}, d_{11}$ | 19.80, -0.46    | -, -            | -, -            |
| $c_{12}, d_{12}$ | 7.63, -7.44     | -, -            | -, -            |
| $c_{13}, d_{13}$ | 1.58, -2.19     | -, -            | -, -            |
| $c_{14}, d_{14}$ | 0.31, -0.32     | -, -            | -, -            |
| $c_{15}, d_{15}$ | -0.02, 0.02     | -, -            | -, -            |
| $c_{16}, d_{16}$ | -0.01, 0.05     | -, -            | -, -            |
| $c_{21}, d_{21}$ | 249.57, -195.93 | 250.87, -210.77 | 232.48, -190.44 |
| $c_{22}, d_{22}$ | 146.34, -232.31 | 153.82, -241.96 | 132.48, -213.06 |
| $c_{23}, d_{23}$ | 28.60, -27.16   | 30.29, -28.71   | 25.10, -22.34   |
| $c_{24}, d_{24}$ | 8.53, -9.56     | 9.46, -10.41    | 6.41, -7.99     |
| $c_{25}, d_{25}$ | 1.19, -2.28     | 1.31, -2.48     | 0.79, -2.01     |
| $c_{26}, d_{26}$ | 0.24, -0.17     | 0.29, -0.31     | -0.21, 0.25     |
| $c_{31}, d_{31}$ | 1.24, -2.61     | -, -            | -, -            |
| $c_{32}, d_{32}$ | 1.10, -1.43     | -, -            | -, -            |
| $c_{33}, d_{33}$ | 0.02, 0.19      | -, -            | -, -            |
| $c_{34}, d_{34}$ | -0.06, 0.10     | -, -            | -, -            |
| $c_{35}, d_{35}$ | -0.08, 0.08     | -, -            | -, -            |
| $c_{36}, d_{36}$ | -0.15, 0.15     | -, -            | -, -            |
| $c_{41}, d_{41}$ | 24.33, -30.76   | 22.22, -29.55   | 20.55, -25.92   |
| $c_{42}, d_{42}$ | 44.36, -44.61   | 41.28, -41.75   | 36.50, -40.15   |
| $c_{43}, d_{43}$ | 23.87, -25.69   | 23.36, -25.33   | 21.95, -23.96   |
| $c_{44}, d_{44}$ | 10.95, -11.08   | 10.45, -10.59   | 10.07, -9.66    |
| $c_{45}, d_{45}$ | 3.44, -3.41     | 3.38, -3.28     | 2.78, -3.21     |
| $c_{46}, d_{46}$ | 0.66, -0.78     | 0.72, -0.87     | 0.32, -0.31     |
| $c_{51}, d_{51}$ | 0.14, -0.13     | -, -            | -, -            |
| $c_{52}, d_{52}$ | -0.01, -0.01    | -, -            | -, -            |
| $c_{53}, d_{53}$ | -0.23, 0.06     | -, -            | -, -            |
| $c_{54}, d_{54}$ | -0.04, 0.07     | -, -            | -, -            |
| $c_{55}, d_{55}$ | -0.11, 0.10     | -, -            | -, -            |
| $c_{56}, d_{56}$ | -0.04, 0.11     | -, -            | -, -            |
| $c_{61}, d_{61}$ | 0.03, -0.29     | -0.09, -0.42    | -0.48, 1.39     |
| $c_{62}, d_{62}$ | 3.19, -4.01     | 3.48, -4.30     | 3.51, -4.10     |
| $c_{63}, d_{63}$ | 5.11, -4.75     | 5.38, -4.94     | 4.32, -4.72     |
| $c_{64}, d_{64}$ | 2.24, -2.04     | 2.31, -2.12     | 1.52, -1.83     |
| $c_{65}, d_{65}$ | 0.76, -0.81     | 0.91, -0.92     | 0.31, -0.72     |
| $c_{66}, d_{66}$ | 0.15, -0.24     | 0.22, -0.28     | -0.26, 0.15     |

TABLE S.21. Parameters (in  $\text{cm}^{-1}$ ) to fit the linear reaction path potentials of the three systems.

| Parameter | 3FBA    | 4FBA    | BA      |
|-----------|---------|---------|---------|
| $a_0$     | 310.65  | 315.76  | 340.07  |
| $a_1$     | -43.54  | -       | -       |
| $a_2$     | 90.40   | 193.81  | 249.48  |
| $a_3$     | -6.35   | -       | -       |
| $a_4$     | 188.30  | 119.15  | 61.92   |
| $a_5$     | 29.57   | -       | -       |
| $a_6$     | -102.67 | -191.88 | -223.91 |
| $a_7$     | 12.63   | -       | -       |
| $a_8$     | -115.65 | -91.28  | -51.77  |
| $a_9$     | -6.80   | -       | -       |
| $a_{10}$  | -62.29  | -10.60  | 3.77    |
| $a_{11}$  | -13.32  | -       | -       |
| $a_{12}$  | -10.95  | 9.23    | 2.72    |
| $a_{13}$  | -6.20   | -       | -       |
| $a_{14}$  | 8.15    | 0.38    | -0.46   |
| $a_{15}$  | 2.20    | -       | -       |
| $a_{16}$  | 3.66    | -2.23   | -0.25   |
| $a_{17}$  | 2.61    | -       | -       |
| $a_{18}$  | -2.07   | 1.18    | 2.56    |
| $a_{19}$  | -1.10   | -       | -       |
| $a_{20}$  | -1.42   | 0.42    | -1.77   |
| $a_{21}$  | -1.70   | -       | -       |
| $a_{22}$  | 0.23    | -1.21   | 0.66    |
| $a_{23}$  | 0.14    | -       | -       |
| $a_{24}$  | 0.63    | 0.30    | 0.12    |
| $a_{25}$  | 1.38    | -       | -       |
| $a_{26}$  | -0.53   | -0.04   | 0.31    |
| $a_{27}$  |         | -       | -       |
| $a_{28}$  |         | 0.19    | -0.41   |
| $a_{29}$  |         | -       | -       |
| $a_{30}$  |         | -0.39   | -0.38   |
| $a_{31}$  |         | -       | -       |
| $a_{32}$  |         | 0.17    | 0.06    |
| $a_{33}$  |         | -       | -       |
| $a_{34}$  |         | 0.36    | -0.41   |
| $a_{35}$  |         | -       | -       |
| $a_{36}$  |         | -0.23   | -0.17   |
| $a_{37}$  |         | -       | -       |
| $a_{38}$  |         | -0.26   | -0.24   |
| $a_{39}$  |         | -       | -       |
| $a_{40}$  |         | -0.22   | -0.26   |
| $a_{41}$  |         | -       | -       |
| $a_{42}$  |         | -0.57   | 0.09    |

TABLE S.22. Tunneling splittings (in MHz) of the three systems.

| LRP  |       |
|------|-------|
| 3FBA | 0.26  |
| 4FBA | 2.75  |
| BA   | 44.75 |

TABLE S.23. Energy levels along the LRP potential for 3FBA.

| Level Energy / ( $\text{cm}^{-1}$ ) |                 |
|-------------------------------------|-----------------|
| $0^-$                               | 48.937544421292 |
| $0^+$                               | 48.937553289914 |
| $1^-$                               | 97.120247363121 |
| $1^+$                               | 97.120255746611 |

TABLE S.24. Energy levels along the LRP potential for 4FBA.

| Level Energy / ( $\text{cm}^{-1}$ ) |                 |
|-------------------------------------|-----------------|
| $0^+0^+$                            | 48.629386253060 |
| $0^+0^-$                            | 48.629386840881 |
| $0^-0^-$                            | 48.629478109963 |
| $0^-0^+$                            | 48.629478751194 |

TABLE S.25. Energy levels along the LRP potential for BA.

| Level Energy / ( $\text{cm}^{-1}$ ) |                 |
|-------------------------------------|-----------------|
| $0^+0^+$                            | 45.474093162051 |
| $0^+0^-$                            | 45.474095860494 |
| $0^-0^+$                            | 45.475586311217 |
| $0^-0^-$                            | 45.475589934062 |
